# Supplementary material
Source: PubMed Central journal article supplement (PMC5753765)
Supplement: NIHMS927231-supplement.pdf [file NIHMS927231-supplement.pdf]

## **Supplemental Figures and Legends**

**Figure S1. Dose-response relationship of M<sub>4</sub> PAM VU0467154 reversal of D<sub>1</sub> agonist-induced hyperlocomotion. Related to Figure 1**

**Figure S2. Localization of M<sub>4</sub> in the striatum and substantia nigra pars reticulata. Related to Figure 2**

**Figure S3. Origination and density of cholinergic fibers in the substantia nigra pars reticulata. Related to Figure 2**

**Figure S4. D<sub>1</sub> agonists and muscarinic agents do not alter mIPSC amplitude in GABAergic cells of wildtype or D<sub>1</sub>-M<sub>4</sub> knockout mice. Related to Figures 2 and 3**

**Figure S5. Forskolin mimics the GABA releasing effects of D<sub>1</sub> agonists and is blocked by M<sub>4</sub> activation on D<sub>1</sub>-SPNs. Related to Figure 5**

**Figure S6. M<sub>4</sub> activation increases rise time of CBV change in response to D<sub>1</sub> agonists in the cingulate cortex. Related to Figure 6**

**Figure S7. M<sub>4</sub> potentiation has no detectable CBV fMRI effect in subcortical and cortical regions. Related to Figure 6**

**Table S1. Non-Normalized mIPSC inter event interval and amplitude values. Related to Figures 2, 3, 4, and 5**

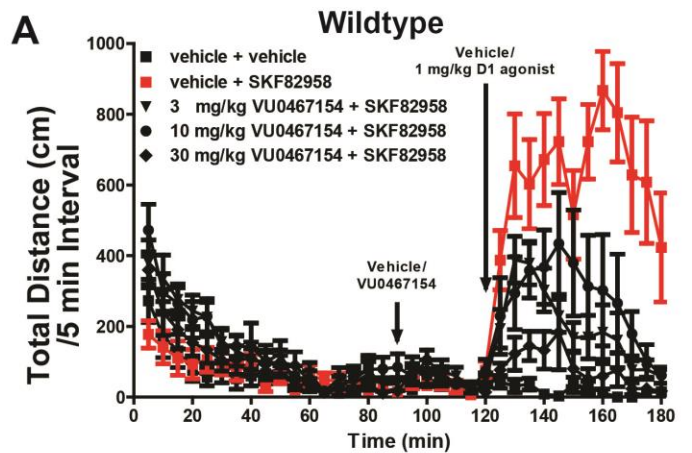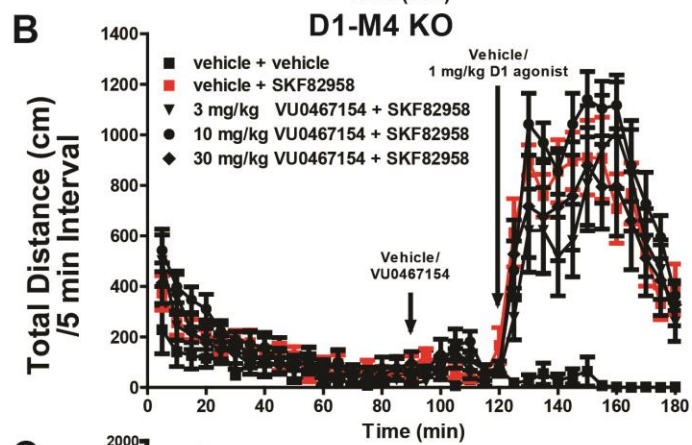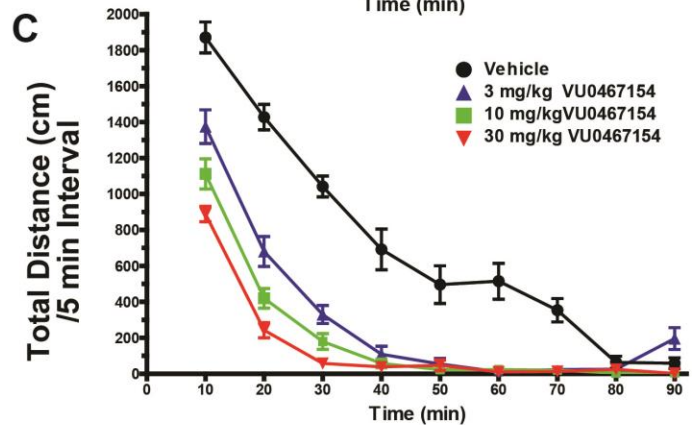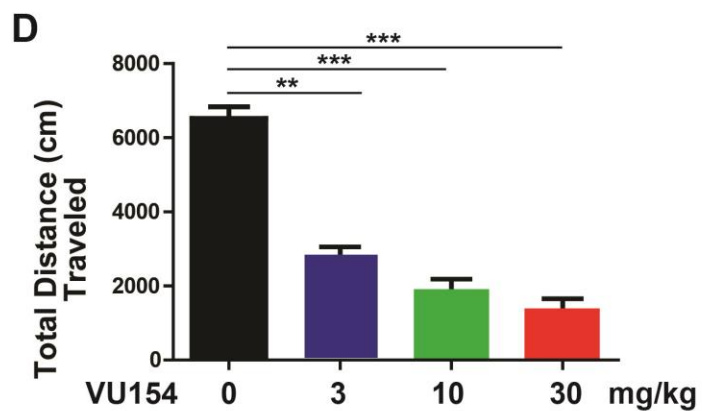

**Figure S1. Related to Figure 1. Dose-response relationship of M<sub>4</sub> PAM VU0467154 reversal of D<sub>1</sub> agonist-induced hyperlocomotion.** **A)** Wildtype (WT) animals were injected with M<sub>4</sub> PAM VU0467154 (3, 10, or 30 mg/kg, intraperitoneal (i.p.), 10% Tween 80) 90 minutes after being placed in locomotion chambers. Thirty minutes later, D<sub>1</sub> agonist SKF82958 was administered (1 mg/kg, i.p., sterile water). Activity was then recorded for an additional 60 min and reported as distance in centimeters (cm) per 5 minute bins. **B)** Animals with M<sub>4</sub> selectively knocked out in DRD<sub>1</sub> expressing striatal spiny projection neurons (D<sub>1</sub>-M<sub>4</sub> KO) were injected with M<sub>4</sub> PAM VU0467154 (3, 10, or 30 mg/kg, i.p., 10% Tween 80) 90 minutes after being placed in locomotion chambers. Thirty minutes after VU0467254 or vehicle injection, D<sub>1</sub> agonist SKF82958 was administered (1 mg/kg, i.p., sterile water). **C)** Wildtype (WT) animals were injected with M<sub>4</sub> PAM VU0467154 (3, 10, or 30 mg/kg, intraperitoneal (i.p.), 10% Tween 80) 30 minutes before being placed in locomotion chambers. Activity was then recorded for 90 min and reported as distance in centimeters (cm) per 5 minute bins. **D)** Total distance moved in cm from animals in (A) after placement in locomotion chambers. Data are mean ± SEM with an n=8-11 per group. \*\* indicates p<0.01, \*\*\* indicates p<0.001 by one way ANOVA followed by Tukey's post-hoc test.

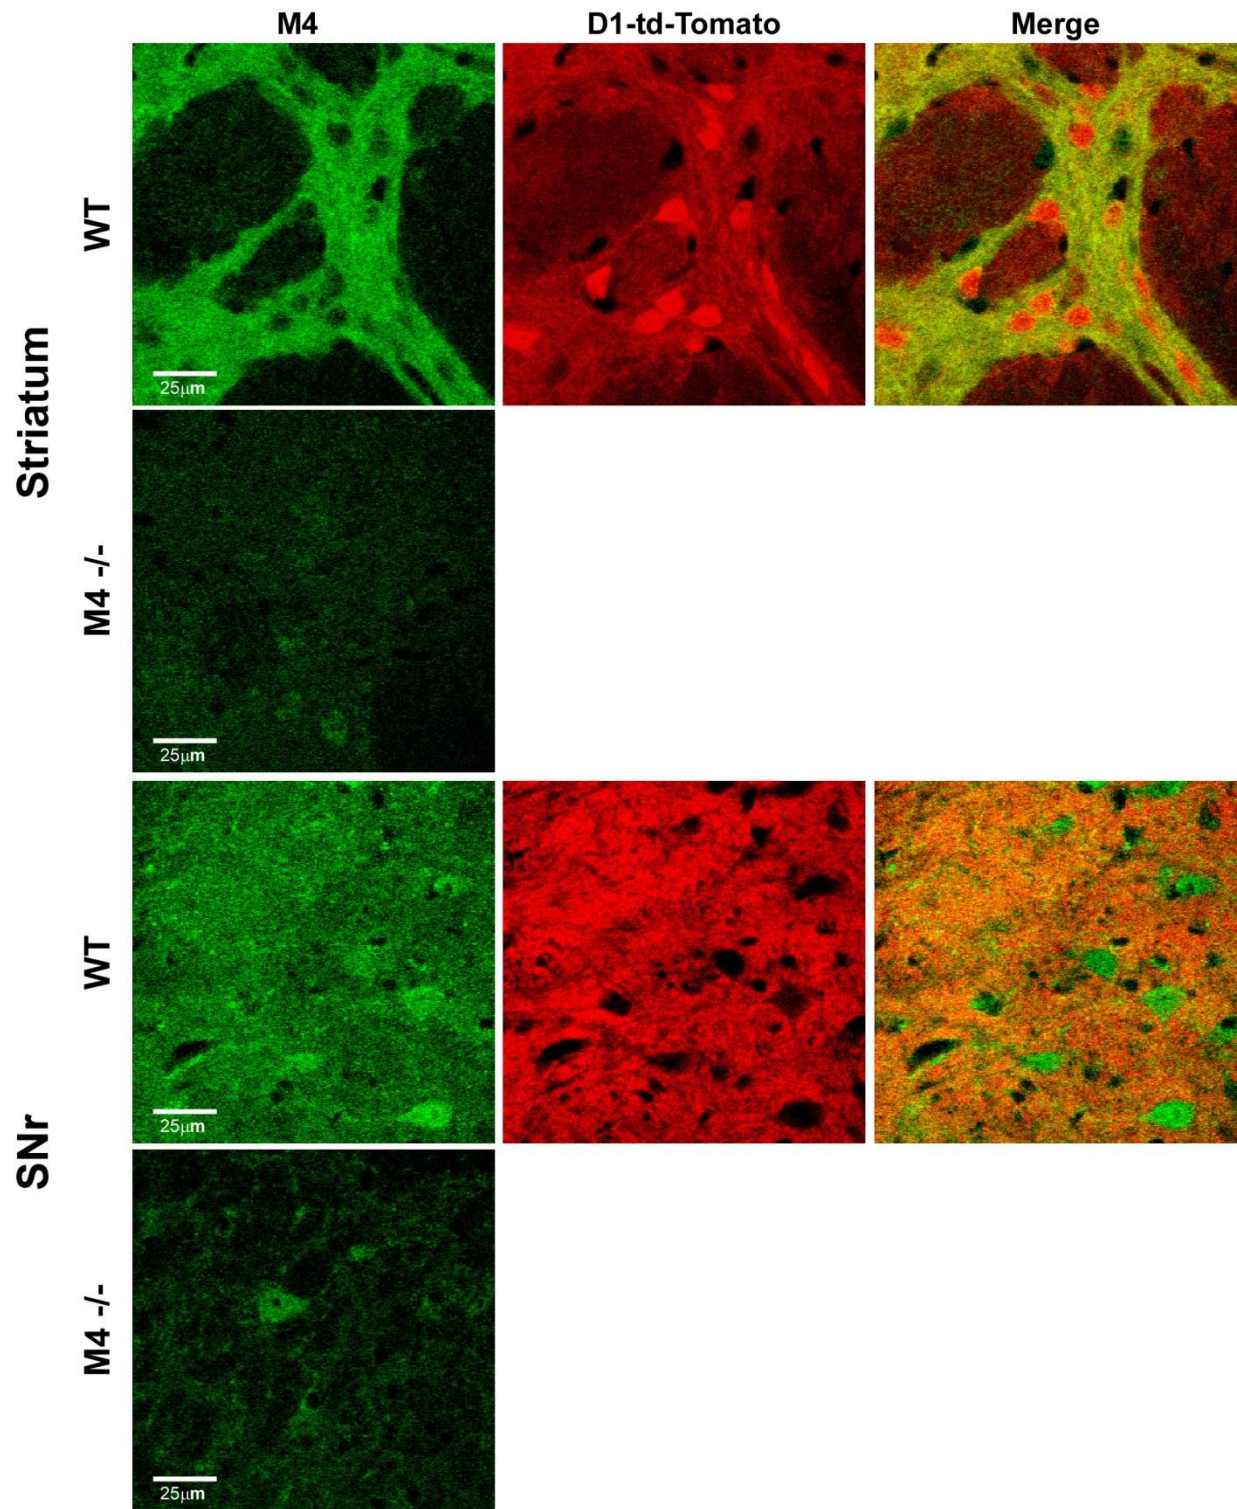

**Figure S2. Related to Figure 2. Localization of M<sub>4</sub> in the striatum and substantia nigra pars reticulata.** Transgenic animals expressing the fluorescent protein td-Tomato under the transcriptional control of the *DRD<sub>1</sub>* promoter were used to visualize cells and projections of the direct pathway and then stained for M<sub>4</sub>. In the substantia nigra pars reticulata (SNr), robust

expression (green) co-localizes with td-Tomato positive puncta indicating that  $M_4$  is expressed in  $DRD_1$ -expressing striatal spiny projection neuron terminals. The  $M_4$  signal is also seen in SNr cell bodies and this staining is also observed in sections derived from  $M_4$  global knockout mice ( $M_4^{-/-}$ ), suggesting an off target effect of the antibody. In the striatum, a diverse pattern of  $M_4$  expression is seen as previously reported (see Levey et al 1991).  $M_4$  staining can be seen inside of  $DRD_1$ -expressing striatal spiny projection neurons as well as in the neuropil.



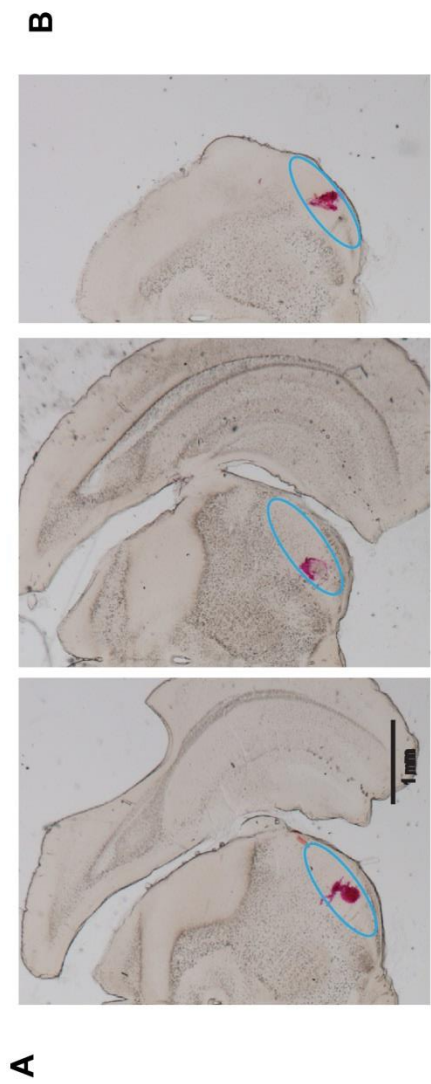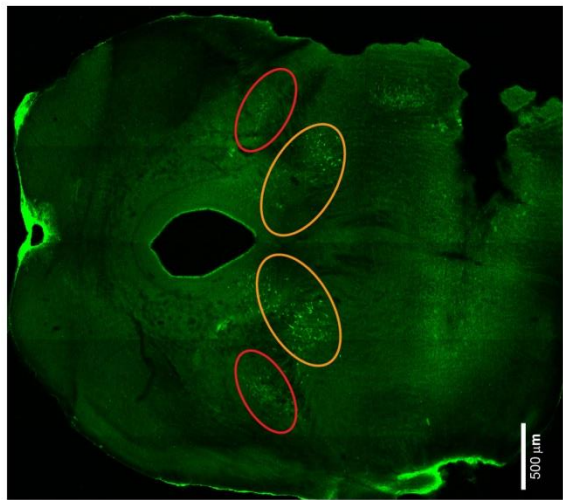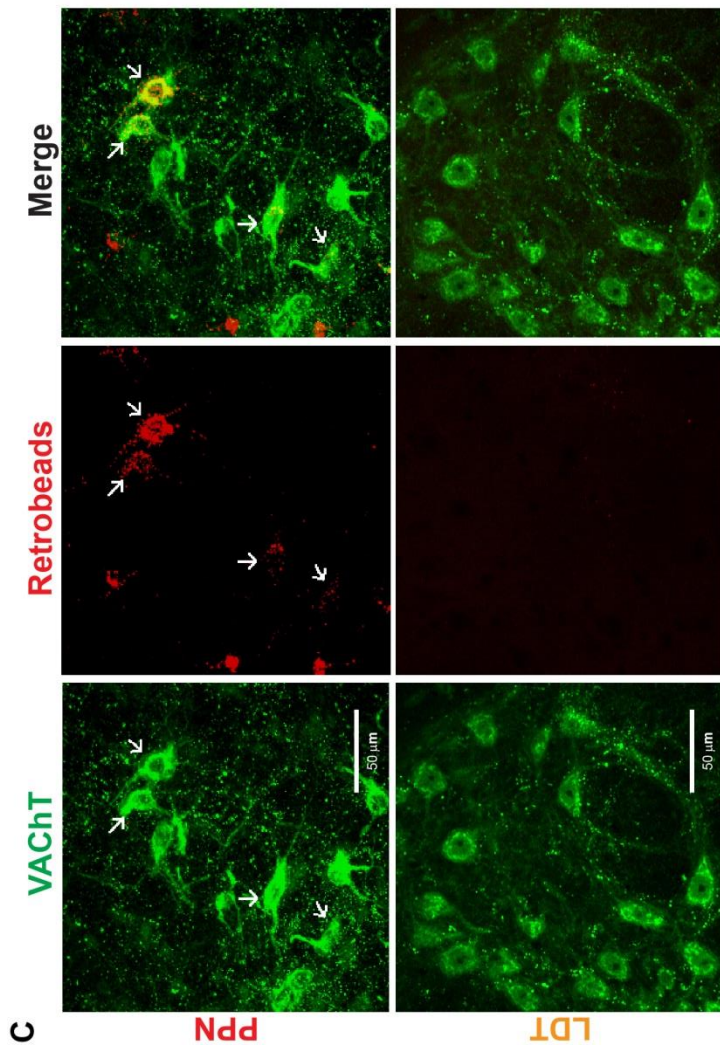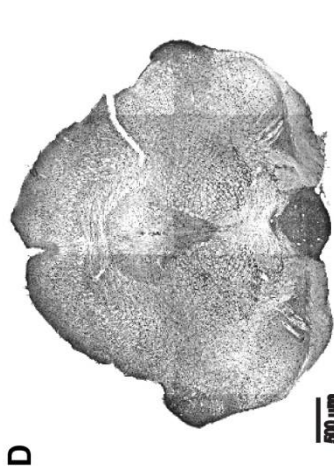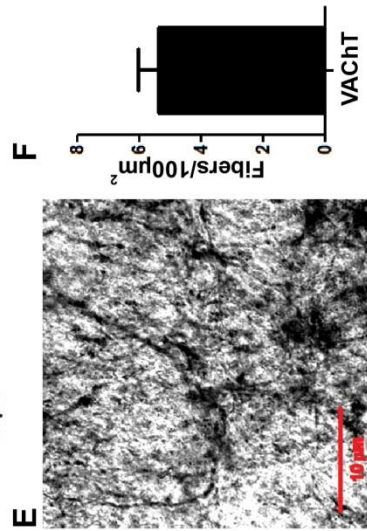

**Figure S3. Related to Figure 2. Origination and density of cholinergic fibers in the substantia nigra pars reticulata.** **A)** Wildtype (WT) animals were injected with 100 nL of red fluorescent retrobeads into the substantia nigra pars reticulata (SNr). Animals were allowed to sit with beads injected for at least one week before sacrifice. Coronal sections were made from post-fixed brains and imaged using a widefield microscope. Blue ellipses indicate the borders of the SNr. The sphere of injection is almost always inside the SNr and only rarely strays outside of the SNr. **B)** The hindbrains of animals from **(A)** were sectioned at 40  $\mu\text{m}$  and stained with antibodies against the vesicular acetylcholine transporter (VACHT) and appropriate secondary antibody. Widefield images of hindbrain sections revealed both the PPN (red ellipses) and LDT (orange ellipses). **C)** Zoomed in images (63X objective) of PPN and LDT areas from **(B)**. Several VACHT positive cells could be identified in both the PPN and LDT, but retrobeads were only identified in cells of PPN. **D)** Widefield DAB image of coronal brain section containing the SNr and stained with VACHT. **E)** 100X image of the SNr from **(D)**. **F)** Estimation of the cholinergic fiber density from **(E)** using an ImageJ plugin.

**A** GABAergic Dopaminergic

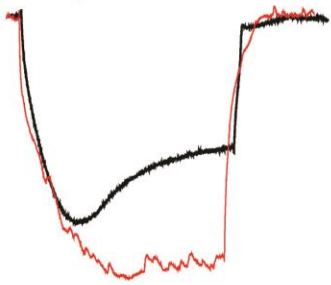

**B**

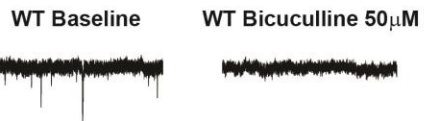

**C**

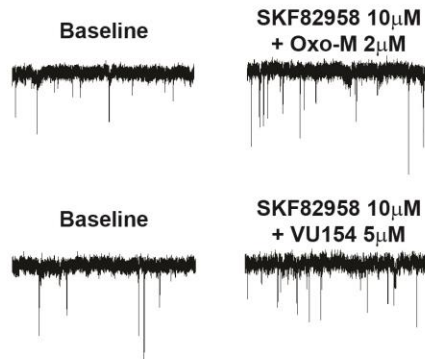

**D**

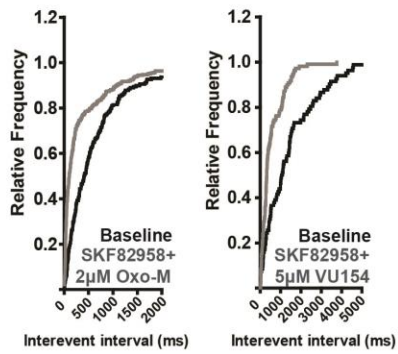

**F**

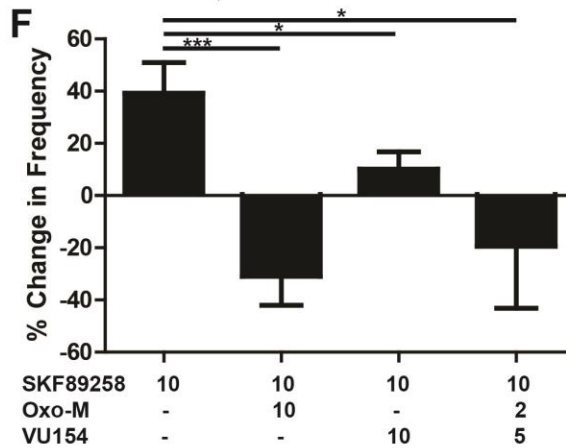

**E**

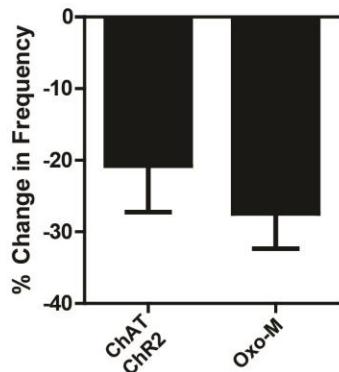

**G**

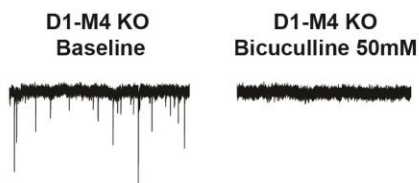

**H**

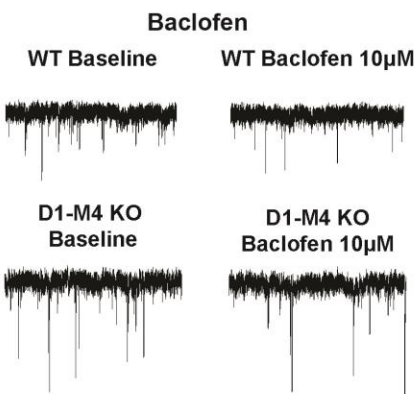

**I**

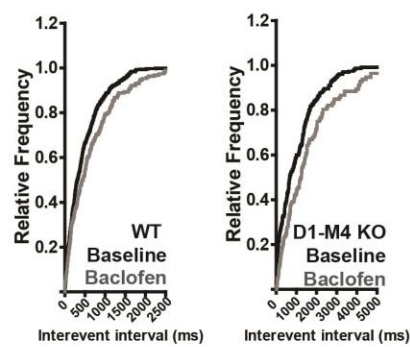

**J**

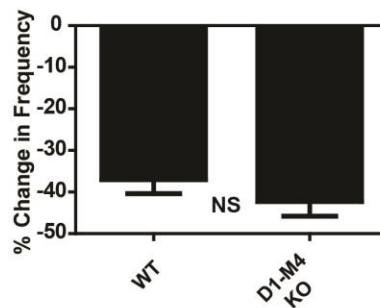



**Figure S4. Related to Figure 2. D<sub>1</sub> agonists and muscarinic agents do not alter mIPSC amplitude in GABAergic cells of wildtype or D<sub>1</sub>-M<sub>4</sub> knockout mice.** **A)** Representative CCIV plots of GABAergic (red) and dopaminergic (black) cells of the SNr as soon as whole cell was achieved. This, as well as firing rate (GABA >10 Hz and DA 1-5 Hz), revealed SNr cell type. **B)** Representative mIPSC traces from GABAergic cells of the SNr before and after treatment with 50  $\mu$ M bicuculline, which removed any detectable events. **C)** Representative mIPSC traces from GABAergic cells of the SNr treated with 10  $\mu$ M SKF82958 and 2  $\mu$ M Oxotremorine-M (Oxo-M) or 5  $\mu$ M VU0467154 in WT mice. **D)** Cumulative probability plots of traces in **(C)**. **E)** Optical stimulation of cholinergic afferents in the SNr from ChAT-ChR2 mice reduced mIPSC frequency by ~20% at baseline which was similar to the effect of application on 10 $\mu$ M Oxo-M alone. This indicates that activation of cholinergic afferents alone in the SNr is sufficient to regulate D<sub>1</sub>-SPN terminals. **F)** Summary of data from slices warmed to 30C before patching and treating with the drugs indicated. Data at 30C recapitulates our findings from Figure 2. **G)** Representative mIPSC traces from GABAergic cells of the SNr before and after treatment with 50  $\mu$ M bicuculline, which removed any detectable events. **H)** Representative mIPSC traces from GABAergic cells of the SNr treated with 10  $\mu$ M baclofen from wildtype (WT) or D<sub>1</sub>-M<sub>4</sub> KO mice. **I)** Cumulative probability plots of traces in **(H)**. **J)** Summary of data represented in **(H, I)**. Negative modulations correspond to decreased mIPSC frequency as compared to baseline. Positive modulation corresponds to an increased mIPSC frequency and negative modulation corresponds to decreased mIPSC frequency as compared to baseline. Data are mean  $\pm$  SEM with an n=8-10 per group. \* indicates p<0.05, \*\*\* indicates p<0.001 by Kruskal-Wallis test followed by Dunnett's post-test. In **(I)** NS indicates not statistically significant by two-tailed t-test.

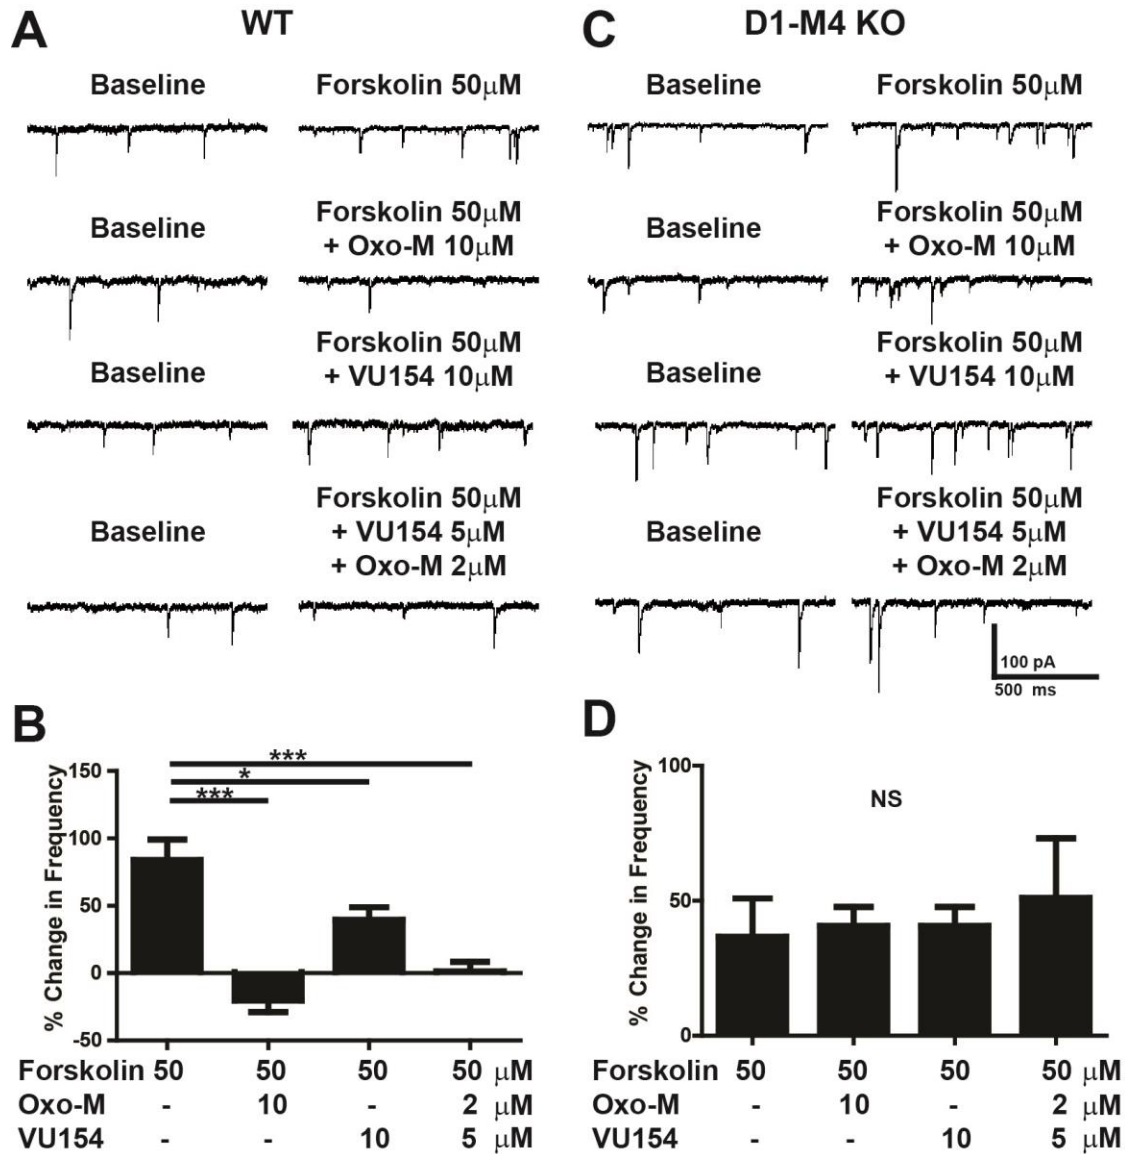

**Figure S6. Related to Figure 5. Forskolin mimics the GABA releasing effects of D<sub>1</sub> agonists and is blocked by M<sub>4</sub> activation on D<sub>1</sub>-SPNs.** **A)** Representative miniature inhibitory post synaptic currents (mIPSC) traces from GABAergic cells of the substantia nigra pars reticulata (SNr) treated with 50  $\mu$ M forskolin and 10  $\mu$ M Oxotremorine-M (Oxo-M), 10  $\mu$ M VU04567154, or 2  $\mu$ M Oxo-M and 5  $\mu$ M VU0467154 in WT mice **B)** Cumulative probability plots of traces in (A). **C)** Summary of data represented in (A, B) Positive modulation corresponds to an increased mIPSC frequency and negative modulation corresponds to decreased mIPSC frequency as compared to baseline. **D)** Representative mIPSC traces from GABAergic cells of the SNr treated with 50  $\mu$ M forskolin and 10  $\mu$ M Oxotremorine-M (Oxo-M), 10  $\mu$ M VU04567154, or 2  $\mu$ M Oxo-M and 5  $\mu$ M VU0467154 in mice with M<sub>4</sub> selectively knocked out in DRD<sub>1</sub>-expressing striatal spiny projection neurons (D<sub>1</sub>-M<sub>4</sub> KO). **E)** Cumulative probability plots of traces in (D). **F)** Graph of data represented in (D). **E)** Positive modulation corresponds to an increased mIPSC frequency and negative modulation corresponds to decreased mIPSC

frequency as compared to baseline. Data are mean  $\pm$  SEM with an n=8-12 per group. \*\* indicates  $p < 0.01$ , \*\*\* indicates  $p < 0.001$ , NS indicates non-significant by one way ANOVA followed by Tukey's post-hoc test.

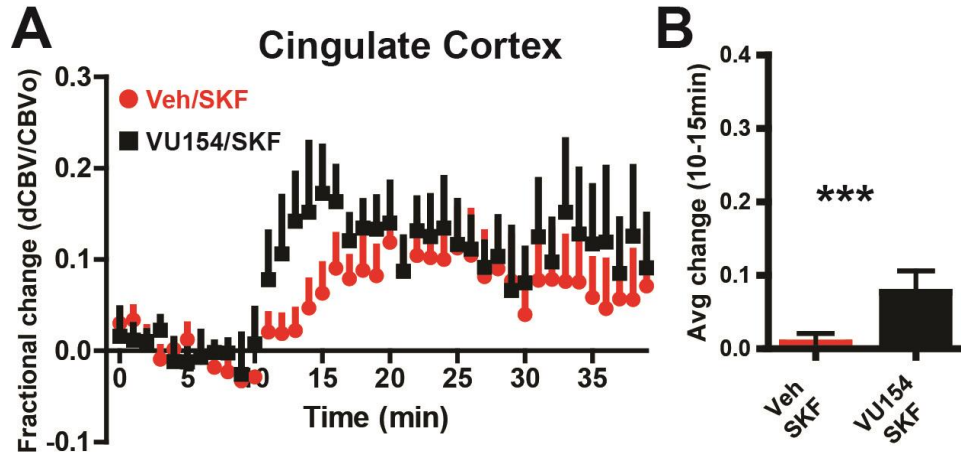

**Figure S7. Related to Figure 6. M<sub>4</sub> activation increases rise time of CBV change in response to D<sub>1</sub> agonists in the cingulate cortex.** **A)** Timeline of cerebral blood volume (CBV) changes after D<sub>1</sub> agonist SKF82958 injection (1mg/kg, intraperitoneal (i.p.), sterile water) in male Sprague-Daley rats pretreated with vehicle (i.p., 10% Tween 80) or 30 mg/kg M<sub>4</sub> PAM VU0467154 (i.p., 10% Tween 80) from the cingulate cortex. Timeline graph shows fractional changes in CBV which are calculated by dividing the CBV signal for each region at each time point (dCBV) by the CBV for each region collected during the baseline period (CBV<sub>0</sub>) before SKF82958 injection. Positive numbers indicate increased CBV, correlating with increased neuronal activity, while negative numbers indicate decreased CBV, correlating with decreased neuronal activity, compared to baseline. **B)** Graph of data from (A), fractional CBV values were averaged between 10 to 15 minutes to isolate the rising portion of the graph. Data are mean ± SEM with an n=6 per group. \*\*\* indicates p<0.001 by Mann-Whitney test.

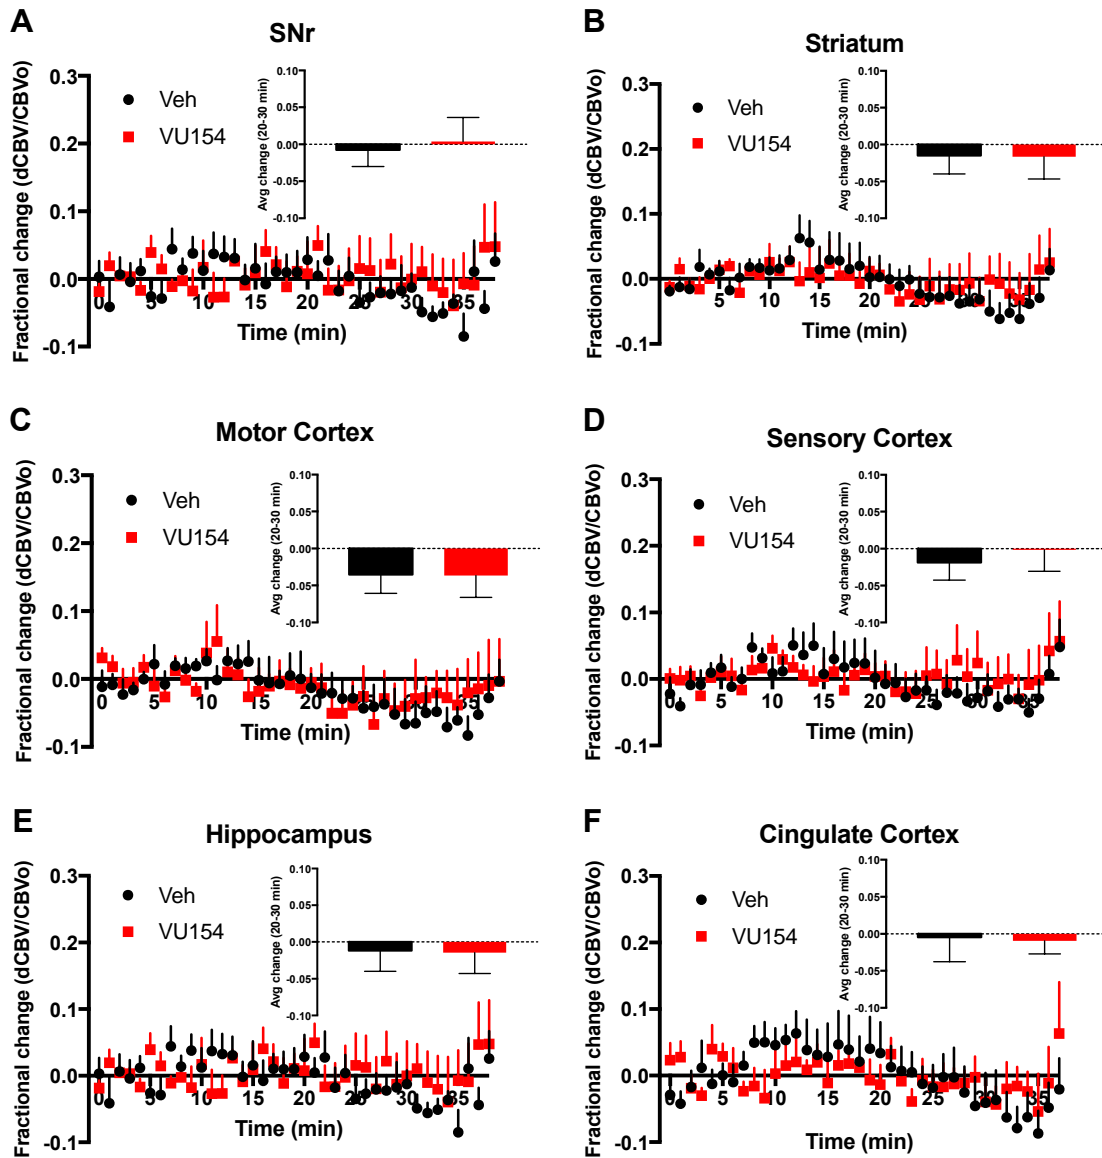

**Supplemental Figure S8. Related to Figure 6. M<sub>4</sub> potentiation has no detectable CBV fMRI effect in subcortical and cortical regions.** A-F) Time courses and bar graphs (insets) of fractional CBV changes after M<sub>4</sub> PAM VU0467154 (30 mg/kg, 10% Tween-80 IP) or vehicle injection in rats in the indicated brain regions. Bar graphs indicate fractional CBV values averaged over time points 20 to 30 minutes. There were no significant effects in any region as indicated by Mann-Whitney U test ( $p > 0.05$ ).



| <b>Figure 2</b>          | Inter-event interval (ms) |                 | Significance | Amplitude (pA) |              | Significance |
|--------------------------|---------------------------|-----------------|--------------|----------------|--------------|--------------|
|                          | WT Mice                   | Baseline        |              | After Drug     | Baseline     |              |
| SKF82958 10μM            | 531.73 ± 600.24           | 358.44 ± 318.36 | p<0.05       | 71.1 ± 13.2    | 81.9 ± 22.5  | NS           |
| + Oxo-M 2μM              | 725.4 ± 517.5             | 560.4 ± 400.9   | p<0.05       | 67.7 ± 31.5    | 65.2 ± 20.1  | NS           |
| + VU154 5μM              | 805.2 ± 409.7             | 645.2 ± 381.4   | p<0.05       | 62.1 ± 13.3    | 56.5 ± 14.3  | NS           |
| + Oxo-M 10μM             | 665.923 ± 514.91          | 818.12 ± 790.84 | NS           | 82.9 ± 11.9    | 77.7 ± 7.6   | NS           |
| + VU154 10μM             | 707.9 ± 506.1             | 735.1 ± 612.4   | NS           | 81.4 ± 20.4    | 95.1 ± 10.9  | NS           |
| + Oxo-M 2μM +VU154 5μM   | 708.5 ± 477.5             | 824.1 ± 479.3   | p<0.05       | 53.1 ± 7.8     | 50.4 ± 4.6   | NS           |
| <i>ChAT Chr2 Mice</i>    |                           |                 |              |                |              |              |
| SKF82958 5μM             | 454.8 ± 321.8             | 364.1 ± 260.2   | p<0.05       | 87.2 ± 27.3    | 89.8 ± 24.8  | NS           |
| + VU154 5μM              | 376 ± 137.6               | 288.3 ± 153.8   | p<0.05       | 79.2 ± 34.2    | 77.1 ± 27.5  | NS           |
| + Light                  | 460.1 ± 68.41             | 352.4 ± 151.9   | p<0.05       | 87.8 ± 31.3    | 82.1 ± 32.9  | NS           |
| + VU154 5 μM + Light     | 738.9 ± 510.4             | 826.4 ± 616.3   | NS           | 80.7 ± 15.2    | 77.1 ± 23.1  | NS           |
| <b>Figure 3</b>          |                           |                 |              |                |              |              |
| <i>D1-M4 KO Mice</i>     | Baseline                  | After Drug      |              | Baseline       | After Drug   |              |
| SKF82958 10μM            | 315.93 ± 359              | 266.56 ± 334    | p<0.05       | 93.1 ± 13.9    | 82.3 ± 26.5  | NS           |
| + Oxo-M 10μM             | 387.1 ± 230.4             | 283.2 ± 121.2   | p<0.05       | 80.5 ± 5.0     | 84.7 ± 15.9  | NS           |
| + VU154 10μM             | 337.5 ± 62.7              | 274.8 ± 69.1    | p<0.05       | 93.1 ± 11.8    | 89.8 ± 18.6  | NS           |
| + Oxo-M 2μM+VU154 5μM    | 456.0 ± 147.4             | 321.9 ± 104.2   | p<0.05       | 89.9 ± 15.9    | 101.6 ± 18.5 | NS           |
| CNO Alone                | 524.9 ± 360.9             | 659.4 ± 486.0   | NS           | 91.1 ± 16.9    | 89.8 ± 17.39 | NS           |
| SKF82958 10μM + CNO 10μM | 724.9 ± 382.9             | 770.6 ± 405.9   | NS           | 86.6 ± 19.7    | 95.8 ± 18.1  | NS           |
| <b>Figure 4</b>          |                           |                 |              |                |              |              |
| <i>WT Mice</i>           | Baseline                  | After Drug      |              | Baseline       | After Drug   |              |
| Scopolamine              | 797.5 ± 391.1             | 501.1 ± 325.7   | p<0.01       | 55.8 ± 7.9     | 58.4 ± 5.2   | NS           |
| MT-3                     | 635.1 ± 502.4             | 463.5 ± 442.0   | p<0.01       | 66.2 ± 6.0     | 63.4 ± 10.2  | NS           |
| VU154                    | 405.5 ± 328.3             | 455.8 ± 345.5   | p<0.05       | 59.7 ± 16.7    | 59.1 ± 17.9  | NS           |
| <i>D1-M4 KO Mice</i>     |                           |                 |              |                |              |              |
| Scopolamine              | 369.4 ± 354.2             | 328.1 ± 314.0   | p<0.05       | 70.9 ± 14.2    | 75.9 ± 13.6  | NS           |
| MT-3                     | 664.9 ± 335.9             | 629.3 ± 317.4   | NS           | 54.9 ± 33.1    | 51.1 ± 27.4  | NS           |
| VU154                    | 383.8 ± 125.7             | 396.6 ± 122.1   | NS           | 85.3 ± 32.8    | 83.6 ± 31.2  | NS           |
| <i>ChAT-Cre Mice</i>     |                           |                 |              |                |              |              |
| Control Virus            | 659.3 ± 502.5             | 430.4 ± 245.8   | p<0.01       | 77.0 ± 4.4     | 77.5 ± 17.4  | NS           |
| Caspase 3 Virus          | 533.3 ± 488.8             | 580.5 ± 489.3   | NS           | 76.4 ± 21.5    | 78.5 ± 25.9  | NS           |
| <b>Figure 5</b>          |                           |                 |              |                |              |              |
| <i>WT Mice</i>           | Baseline                  | After Drug      |              | Baseline       | After Drug   |              |
| β2-ChR                   | 664.9 ± 579.7             | 474.2 ± 392.4   | p<0.001      | 86.8 ± 13.7    | 82.3 ± 16.8  | NS           |
| + Oxo-M 10μM             | 498.7 ± 404.7             | 488.5 ± 388.1   | NS           | 80.9 ± 17.3    | 86.0 ± 23.2  | NS           |
| + Oxo-M 2μM+VU154 5μM    | 607.8 ± 704.3             | 657.7 ± 766.0   | NS           | 82.3 ± 15.8    | 83.8 ± 16.0  | NS           |
| GFP                      | 433.6 ± 249.7             | 430.7 ± 230.5   | NS           | 62.8 ± 15.9    | 54.8 ± 10.8  | NS           |
| <i>D1-M4 KO Mice</i>     |                           |                 |              |                |              |              |
| β2-ChR                   | 552.6 ± 279.0             | 361.8 ± 212.3   | p<0.001      | 91.6 ± 27.2    | 96.3 ± 36.2  | NS           |
| + Oxo-M 10μM             | 419.4 ± 243.2             | 318.9 ± 218.6   | p<0.01       | 79.2 ± 34.2    | 75.4 ± 30.0  | NS           |
| + Oxo-M 2μM+VU154 5μM    | 300.2 ± 173.1             | 236.7 ± 262.0   | p<0.05       | 96.2 ± 17.5    | 94.2 ± 10.5  | NS           |
| GFP                      | 294.9 ± 221.8             | 277.8 ± 208.8   | NS           | 65.4 ± 15.8    | 66.5 ± 21.2  | NS           |
